# Supplementary material for: Characterisation of the Quaternary eruption record: analysis of the Large Magnitude Explosive Volcanic Eruptions (LaMEVE) database
Source: Springer Nature journal article supplement (doi:10.1186/2191-5040-3-5), 2014-03-25

(a) Global 2 Ma - Present

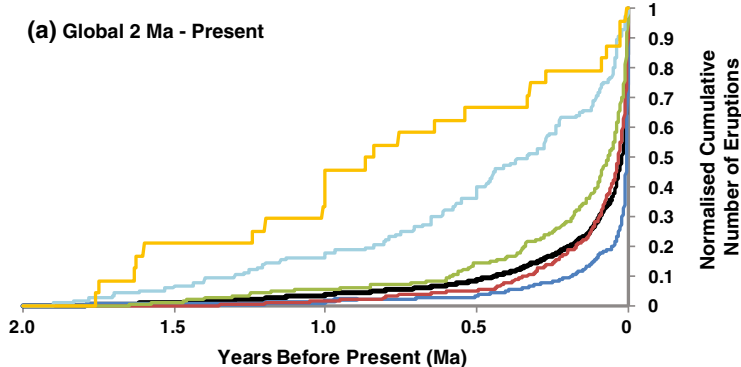

(b) Global 50-1 ka

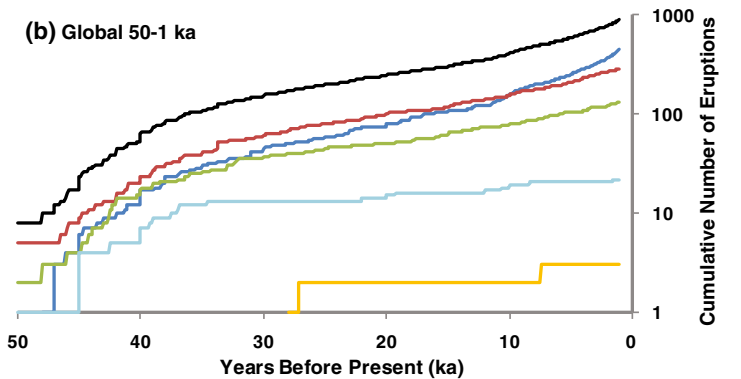

Supplement: 13617_2013_12_MOESM5_ESM.pdf [file 13617_2013_12_MOESM5_ESM.pdf]
