# Supplementary material for: Characterisation of the Quaternary eruption record: analysis of the Large Magnitude Explosive Volcanic Eruptions (LaMEVE) database
Source: Springer Nature journal article supplement (doi:10.1186/2191-5040-3-5), 2014-03-25

**(a) M4-4.9**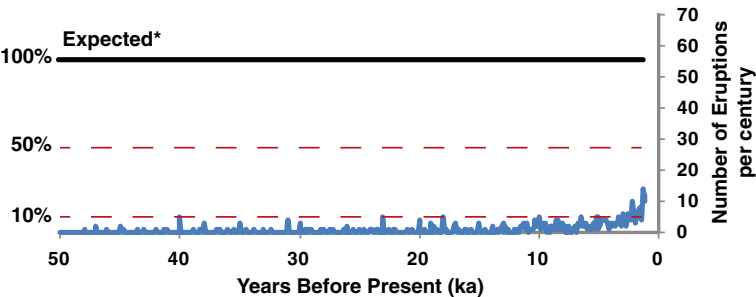**(b) M5-5.9**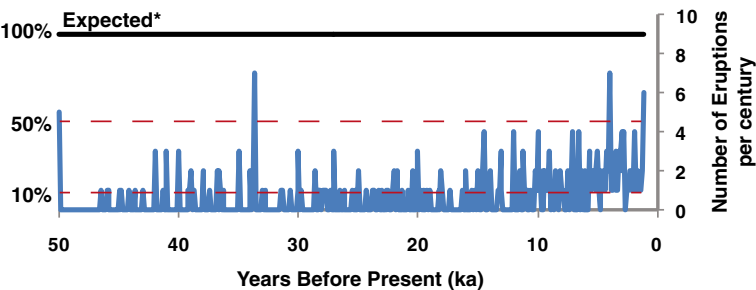**(c) M6-6.9**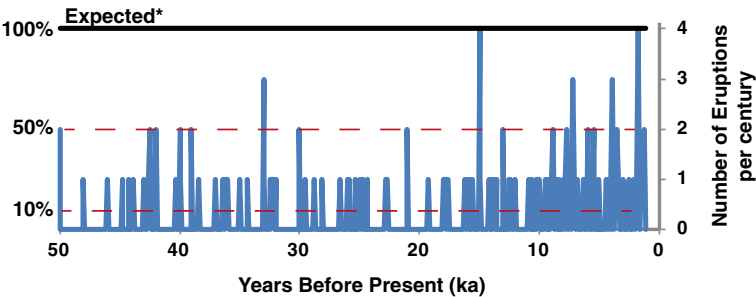

Supplement: 13617_2013_12_MOESM7_ESM.pdf [file 13617_2013_12_MOESM7_ESM.pdf]
