# Supplementary material for: Characterisation of the Quaternary eruption record: analysis of the Large Magnitude Explosive Volcanic Eruptions (LaMEVE) database
Source: Springer Nature journal article supplement (doi:10.1186/2191-5040-3-5), 2014-03-25
Supplement: 13617_2013_12_MOESM10_ESM.pdf [file 13617_2013_12_MOESM10_ESM.pdf]

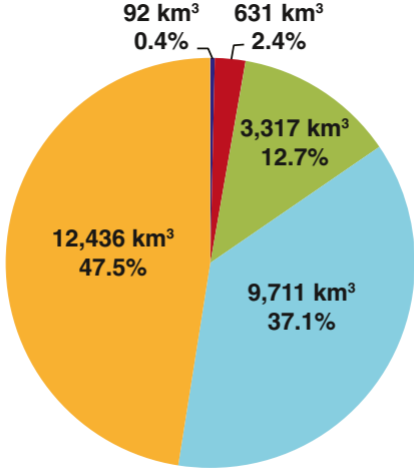

**M4 - 4.9** **M5 - 5.9** **M6 - 6.9** **M7 - 7.9** **M8 - 8.9**
